# Supplementary material for: Strain evolution from the ferroelectric to the relaxor state in (0.67 − x)BiFeO3–0.33BaTiO3–xBi(Mg0.5Zr0.5)O3 lead-free ceramics
Source: Royal Society of Chemistry journal article supplement (doi:10.1039/d4cp02173h), 2024-01-01
Supplement: d4cp02173h1.pdf [file d4cp02173h1.pdf]

*Supplementary Information*

*for*

**Strain evolution from ferroelectric to relaxor state in  $(0.67-x)\text{BiFeO}_3\text{-}0.33\text{BaTiO}_3\text{-}x\text{Bi}(\text{Mg}_{0.5}\text{Zr}_{0.5})\text{O}_3$  lead free ceramics**

Jiaqing Feng, Yiting Zhang, Xilong Song, Zixin Liu, Chen Liao, Lin Zhao, Bo Wu\*,  
Hong Tao, Jian Ma

Sichuan Province Key Laboratory of Information Materials, Southwest Minzu  
University, Chengdu, 610225, P. R. China.

\* Corresponding author: [wubo7788@126.com](mailto:wubo7788@126.com)

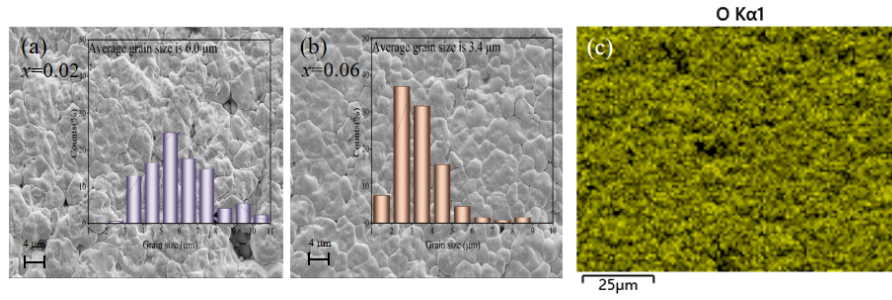

Figure S1. SEM images and grain size distributions of BF-BT- $x$ BMZ ceramics: (a)  $x = 0.02$ ; (b)  $x = 0.06$ ; (c) Element mapping of 0.63BF-0.33BT-0.04BMZ ceramic.

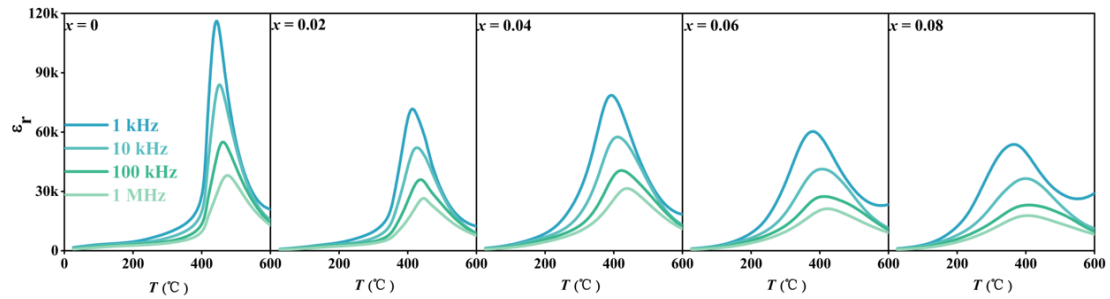

Figure S2. the  $\epsilon_r$ - $T$  curves of each component measured at 25-600 °C.

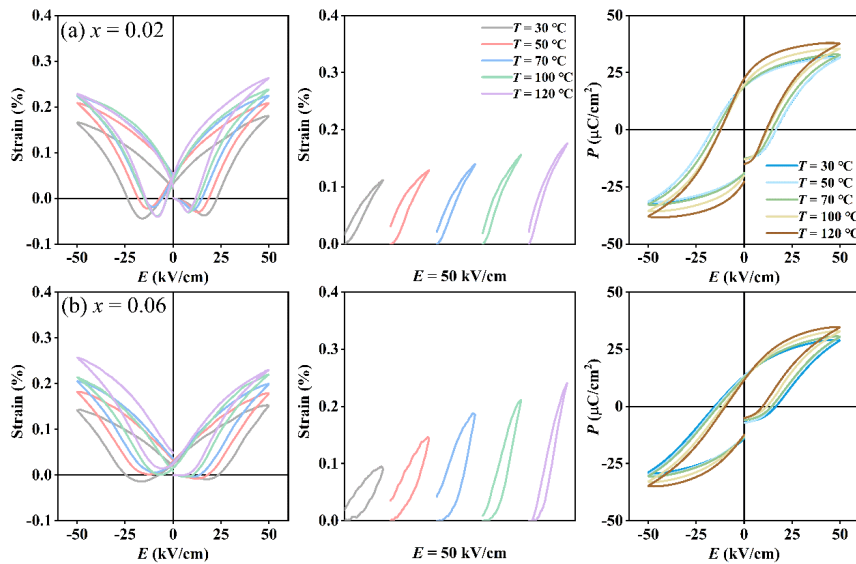

Figure S3. bipolar and unipolar strain curves and  $P$ - $E$  loops at different temperature (a)  $x = 0.02$ ; (b)  $x = 0.06$ .

Table S1. Piezoelectric property of piezoelectric ceramics.

| Materials            | $d_{33}$ (pC/N) | Reference |
|----------------------|-----------------|-----------|
| PNN-PZT-xLN          | ~1178 pC/N      | [1]       |
| BF-BT-xBA            | ~283 pC/N       | [2]       |
| BF(MN)(x)-BT-BNT     | ~240 pC/N       | [3]       |
| 0.75BF-0.25BZT       | ~138 pC/N       | [4]       |
| 0.34BF-0.33BT-0.33BG | ~402 pC/N       | [5]       |
| BF-BT                | ~170 pC/N       | This work |
| BF-BT-0.04BMZ        | ~35 pC/N        | This work |
| BF-BT-0.08BMZ        | ~10 pC/N        | This work |

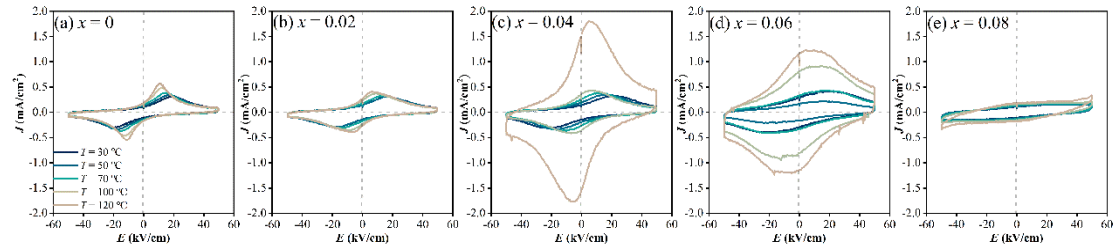

Figure S4. The J-E loops of BF-BT-xBMZ at different temperature.

Table S2. Leakage current density of BF-BT based material systems.

| Materials                                                                                     | $J$ (mA/cm <sup>2</sup> )   | Temperature (°C) | Reference |
|-----------------------------------------------------------------------------------------------|-----------------------------|------------------|-----------|
| 0.75BF-0.25BT                                                                                 | ~0.4-2.1 mA/cm <sup>2</sup> | 20-100 °C        | [6]       |
| 0.65BF-0.35BT                                                                                 | ~0.9-2.6 mA/cm <sup>2</sup> | 20-100 °C        | [6]       |
| 0.55BF-0.45BT                                                                                 | ~0.9-1.1 mA/cm <sup>2</sup> | 20-100 °C        | [6]       |
| $\text{Bi}_{0.8}(\text{Sr}_{0.5}\text{Ca}_{0.5})_{0.2}\text{Fe}_{0.8}\text{Ti}_{0.2}\text{O}$ | ~1.5 mA/cm <sup>2</sup>     | Room-tem         | [7]       |
| 3                                                                                             |                             |                  |           |
| $\text{Bi}_{0.6}(\text{Sr}_{0.5}\text{Ca}_{0.5})_{0.4}\text{Fe}_{0.6}\text{Ti}_{0.4}\text{O}$ | ~0.9 mA/cm <sup>2</sup>     | Room-tem         | [7]       |
| 3                                                                                             |                             |                  |           |
| 0.73BF-0.27BTGT                                                                               | ~1.2 mA/cm <sup>2</sup>     | Room-tem         | [8]       |
| 0.67BF-0.33BT                                                                                 | ~0.2-0.6 mA/cm <sup>2</sup> | 30-120 °C        | This work |

|               |                             |           |           |
|---------------|-----------------------------|-----------|-----------|
| BF-BT-0.04BMZ | ~0.3-1.7 mA/cm <sup>2</sup> | 30-120 °C | This work |
| BF-BT-0.08BMZ | ~0.1-0.3 mA/cm <sup>2</sup> | 30-120 °C | This work |

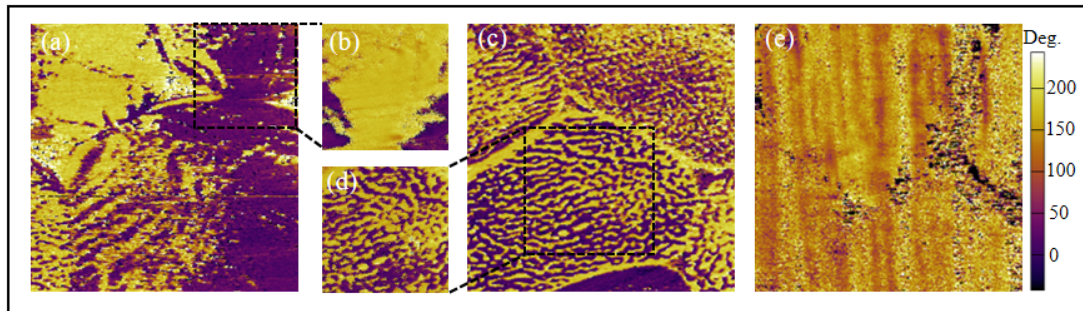

Figure S5. Phase images of ceramics (a) and (b)  $x = 0$ ; (c) and (d)  $x = 0.04$ ; (e)  $x = 0.08$ .

## REFERENCE

- [1] W Peng, J L Chang, et al. Ultrahigh piezoelectricity of PNN-PZT ceramics via constructing defect dipoles, *Ceram. Int.* 50(4) (2024) 6598-6605.
- [2] X X Zhou, Y C Tang, et al. BiAlO<sub>3</sub>-modified BiFeO<sub>3</sub>-BaTiO<sub>3</sub> high Curie temperature lead-free piezoelectric ceramics with enhanced performance, *Rare Metals*, 2023, 42(11): 3839-3850.
- [3] A W Xie, M S Wang, et al. Superior lead-free high-temperature piezoceramics of BiFeO<sub>3</sub>-BaTiO<sub>3</sub>-(Bi<sub>0.5</sub>Na<sub>0.5</sub>)TiO<sub>3</sub> through cooperative regulation, *J. Mater. Chem. A*, 2023, 11(16): 9066-9073.
- [4] J G Chen, J R Cheng. High Electric-Induced Strain and Temperature-Dependent Piezoelectric Properties of 0.75BF–0.25BZT Lead-Free Ceramics, *J. Am. Ceram. Soc.*, 2016, 99(2): 536-542.
- [5] M H Lee, D J Kim, J S Park, et al. High-Performance Lead-Free Piezoceramics with High Curie Temperatures, *Adv. Mater.* 27(43) (2015) 6976-6982.
- [6] C Y Li, T Zheng, J G Wu. Competitive mechanism of temperature-dependent

electrical properties in BiFeO<sub>3</sub>-BaTiO<sub>3</sub> ferroelectrics controlled by domain evolution, Acta. Mater, 2021, 206: 116601.

[7] J Liu, X Q Liu, X M Chen. Significantly enhanced ferroelectricity and magnetic properties in (Sr<sub>0.5</sub>Ca<sub>0.5</sub>)TiO<sub>3</sub>-modified BiFeO<sub>3</sub> ceramics, J. Appl. Phys, 2015, 117(17): 174101.

[8] X T Guo, Y Sun, L L Liu, et al. Effect of different ionic valence state doping on the structure and characteristic of BiFeO<sub>3</sub>-BaTiO<sub>3</sub>-based ceramics. Int. J. Appl. Ceram. Tec, 2024, 21(3): 1688-1699.
